# Supplementary material for: Exploring the combined use of SMAP and Sentinel-1 data for downscaling soil moisture beyond the 1 km scale
Source: Copernicus journal article supplement (doi:10.5194/hess-26-3337-2022), 2022-07-04
Supplement: Supplementary file 1 [file hess-26-3337-2022-supplement.pdf]

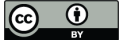

*Supplement of*

## **Exploring the combined use of SMAP and Sentinel-1 data for downscaling soil moisture beyond the 1 km scale**

**Rena Meyer et al.**

*Correspondence to:* Rena Meyer ([rena.meyer@uol.de](mailto:rena.meyer@uol.de))

The copyright of individual parts of the supplement might differ from the article licence.

## Supplementary Material

**Table S1: Available satellite data sets and reduction due to temperature and synchronization effects. The temporal interval of synchronized data is three days of consecutive data followed by three days without data.**

| Days                        | SMAP      | Sentinel-1 |
|-----------------------------|-----------|------------|
| original                    | 881       | 428        |
| Without data                | 24 → 857  |            |
| Low T                       | 77 → 780  |            |
| Lost during synchronization | 403 → 377 | 51 → 377   |
| Final data set              | 377       | 377        |

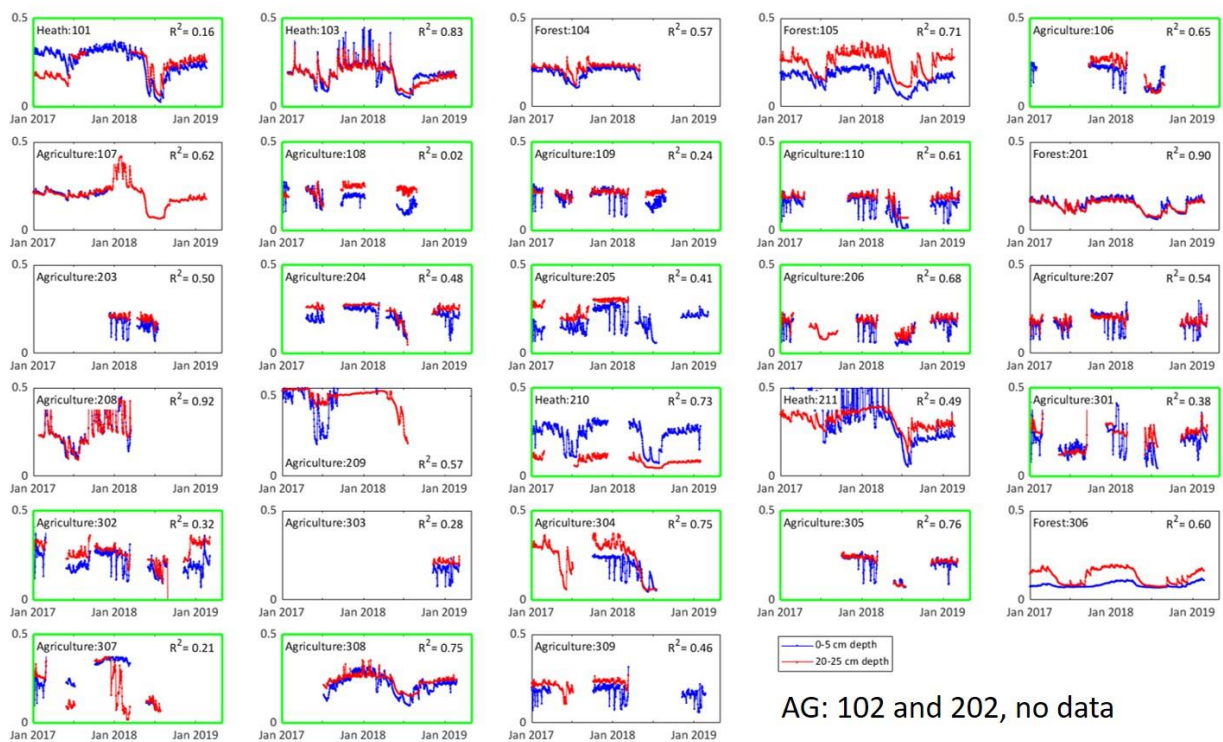

**Figure S1: Time series of soil moisture measured by capacitance probes at a depth of 0-5 cm (blue) and at a depth of 20-25 cm (red).  $R^2$  is the coefficient of determination based on the linear regression between the soil moisture measured at the two different depth. Those sensors used for the analysis are highlighted in green.**

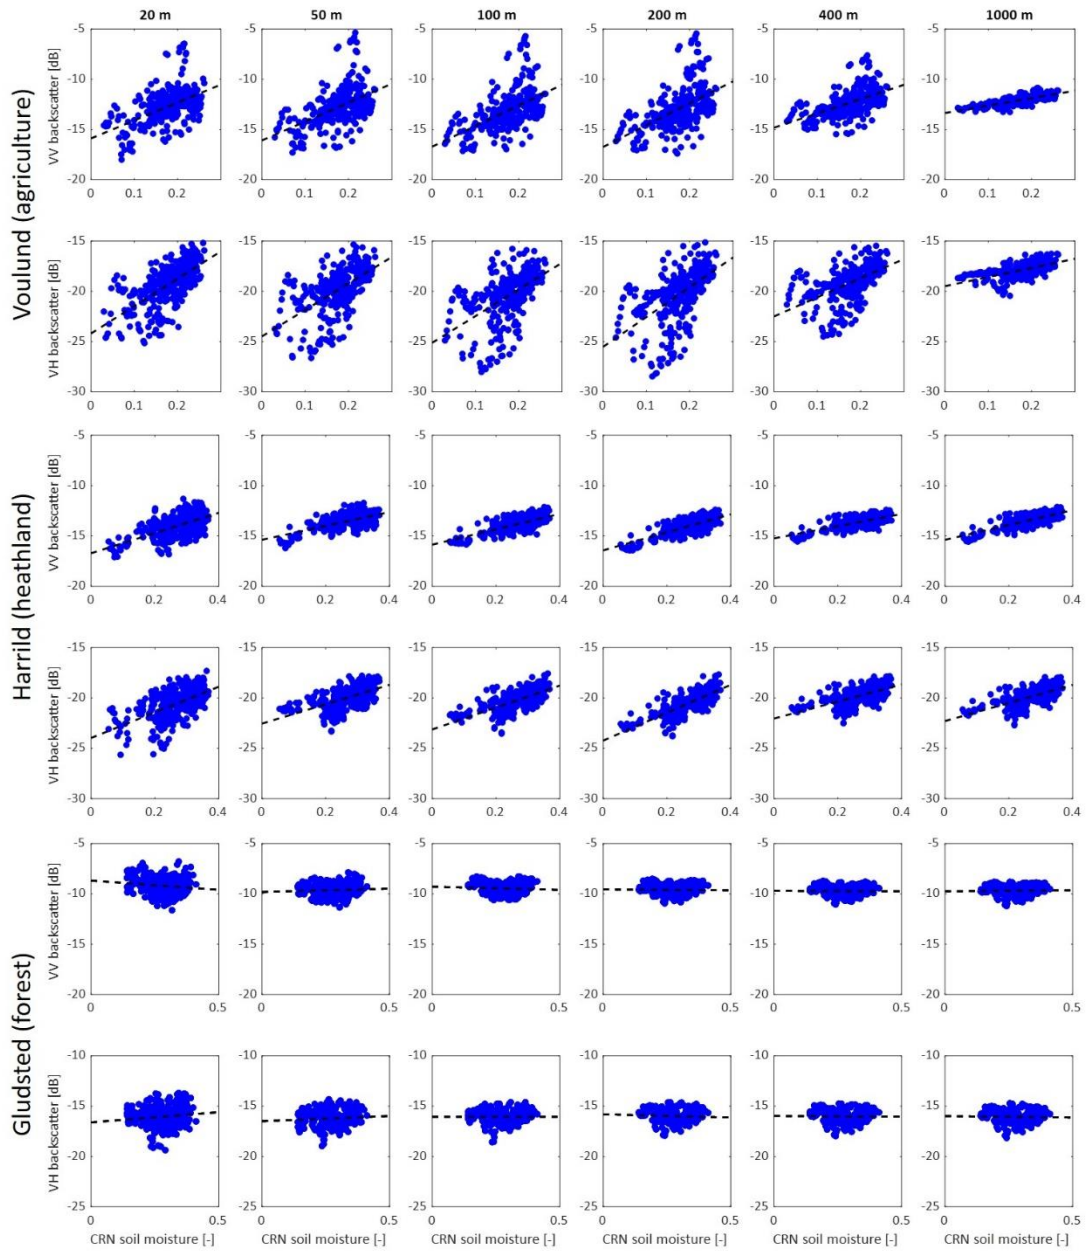

**Figure S2: Scatterplot of VV and VH backscatter vs. CRN soil moisture at the three CRN station sites and six different resolutions (20 m - 1000 m). Black dotted line indicates the linear regression line.**

**Table S2: Statistics of  $\theta$  (SMAP) versus VH at spatial resolutions of 20 m, 100 m and 1000 m, shown invariant in space (entire area) or variant in space according to the three clusters.**

| $\theta$ vs VH | 20 m  |                | 100 m |                | 1000 m |                |
|----------------|-------|----------------|-------|----------------|--------|----------------|
|                | slope | R <sup>2</sup> | slope | R <sup>2</sup> | slope  | R <sup>2</sup> |
| Entire area    | 0.036 | 0.293          | 0.037 | 0.293          | 0.037  | 0.293          |
| Agriculture    | 0.018 | 0.239          | 0.020 | 0.249          | 0.028  | 0.296          |
| Heathland      | 0.048 | 0.378          | 0.047 | 0.374          | 0.042  | 0.314          |
| Forest         | 0.082 | 0.253          | 0.074 | 0.226          | 0.054  | 0.175          |

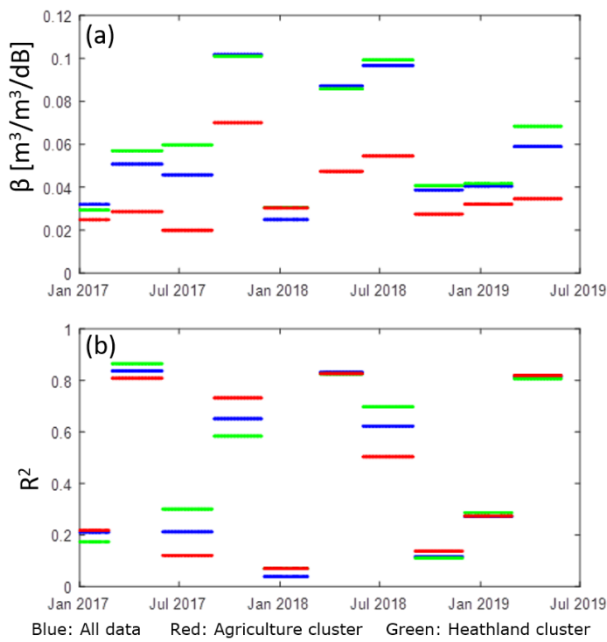

**Figure S3: (a)  $\beta$  estimated over an interval of 3 month\* (Dec-Feb, Mar-May, Jun-Aug, Sep-Nov, representing the seasons in Denmark) and (b) the respective  $R^2$  \* except for the first interval, starting with January (2 month interval).**

Figure S3 shows the seasonally varying  $\beta$  estimates and the corresponding  $R^2$ . It can be concluded that there is a slight seasonality in  $\beta$  with lower values in winter and higher values in summer (Fig S3 a). However, when considering only  $\beta$ -values with an acceptable  $R^2$  of 0.5. (Fig S3 b), this trend might not be as significant. To estimate a robust time variant  $\beta$ , a dynamic in the range throughout the year would be needed, but  $\beta$  maintains a relatively constant value, except during the summer. Hence, it is rather difficult to achieve a good estimation of correlation when there is only little variation in the data (during the rest of the year). On the other hand, it can be observed that particularly the  $\beta$  estimates for the agriculture cluster (Fig. S3 red) deviate significantly from the other data (Fig. S3 all=blue and heathland=green). This supports the approach in estimating spatial varying (land cover dependent) but time invariant  $\beta$ .

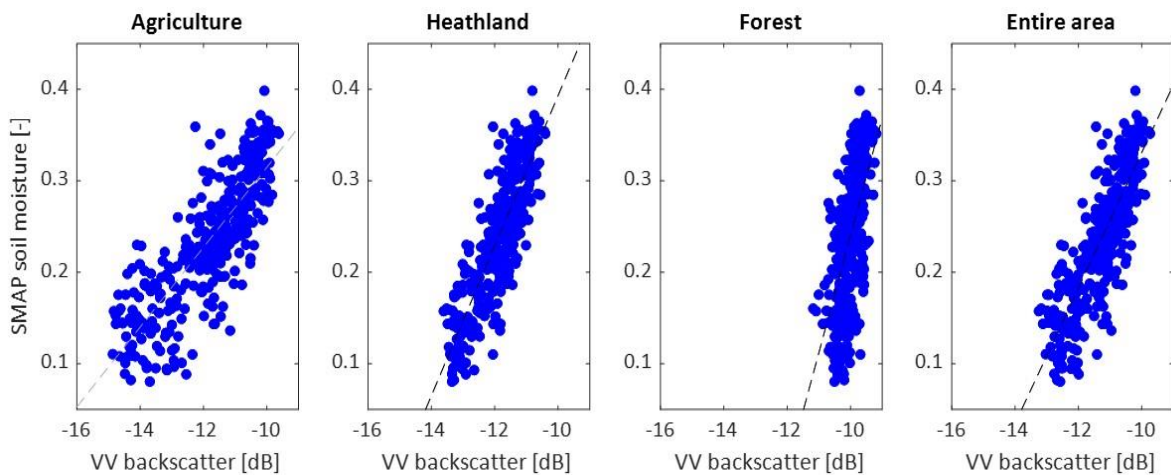

**Figure S4:  $\beta$  estimation ( $\theta$ SMAP vs. VV) for the three individual clusters and the entire area.**

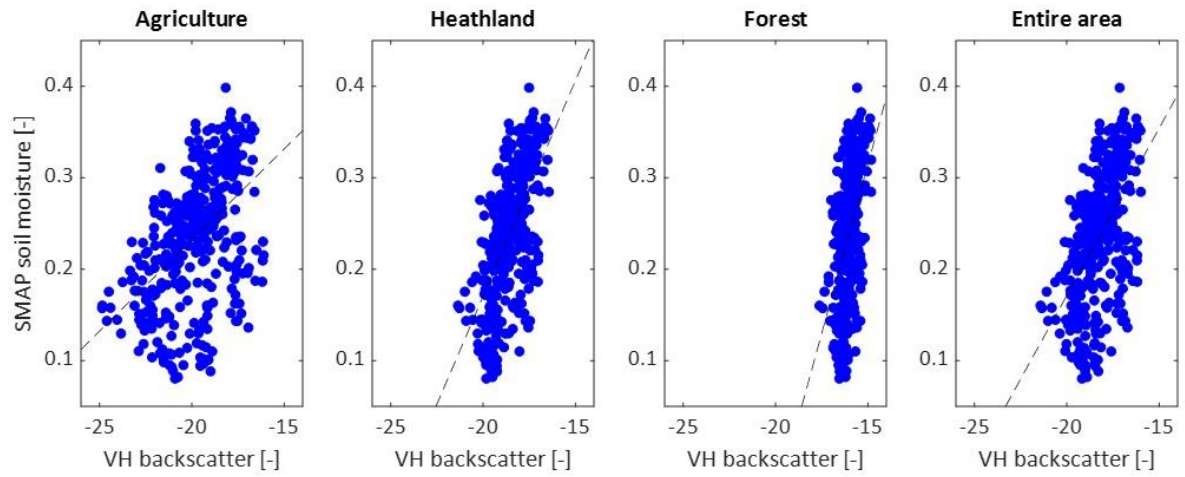

**Figure S5: Scatter plots of SMAP estimated soil moisture vs. Sentinel-1 VH backscatter for the different clusters and the entire area.**

**Table S4: Example of  $\Gamma$  ( $\delta(VV/VH)$ ) estimation results for time-constant and space-independent (entire area) and space-dependent (based on the mean of Clusters)  $\Gamma$ .**

| $\Gamma$ estimation | 20 m     |       | 100 m    |       | 1000 m   |       |
|---------------------|----------|-------|----------|-------|----------|-------|
|                     | $\Gamma$ | $R^2$ | $\Gamma$ | $R^2$ | $\Gamma$ | $R^2$ |
| Entire area         | 0.622    | 0.719 | 0.623    | 0.718 | 0.625    | 0.718 |
| Agriculture         | 0.610    | 0.660 | 0.622    | 0.662 | 0.628    | 0.681 |
| Heathland           | 0.635    | 0.719 | 0.634    | 0.724 | 0.6230   | 0.729 |
| Forest              | 0.630    | 0.784 | 0.627    | 0.776 | 0.629    | 0.799 |

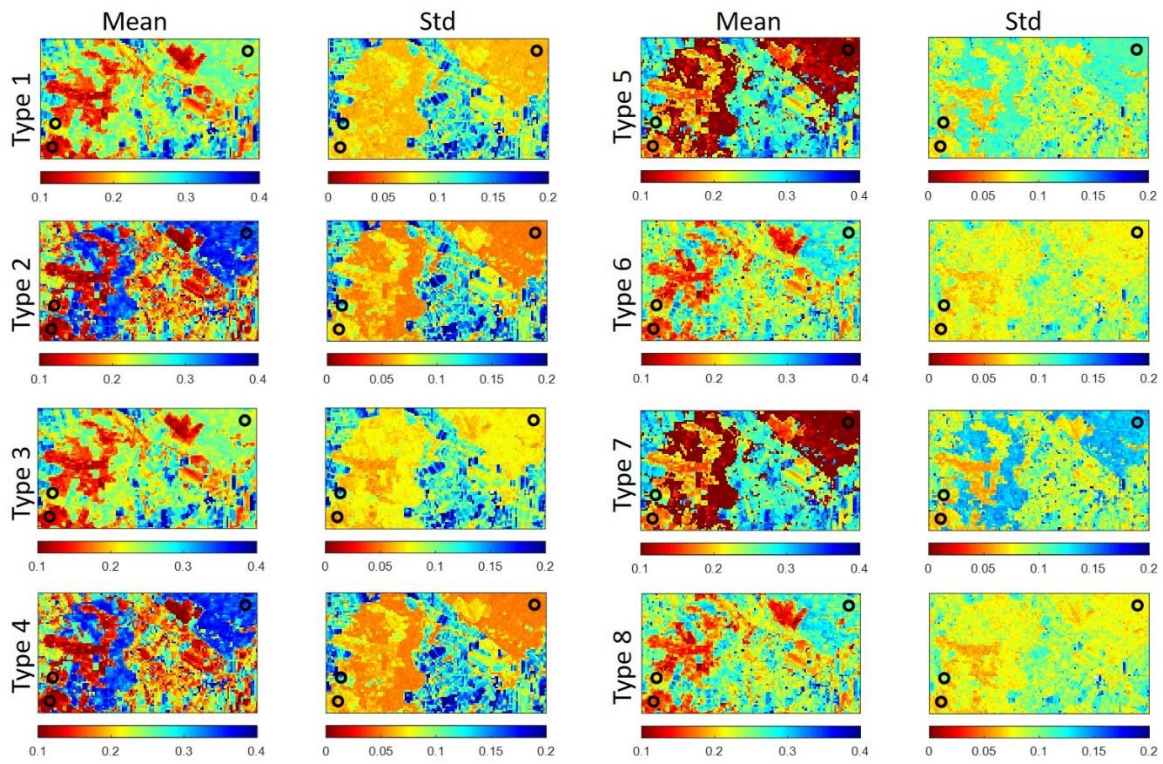

Figure S6: Downscaled soil moisture (mean and std) at a spatial resolution of 100 m shown for all 8 types.

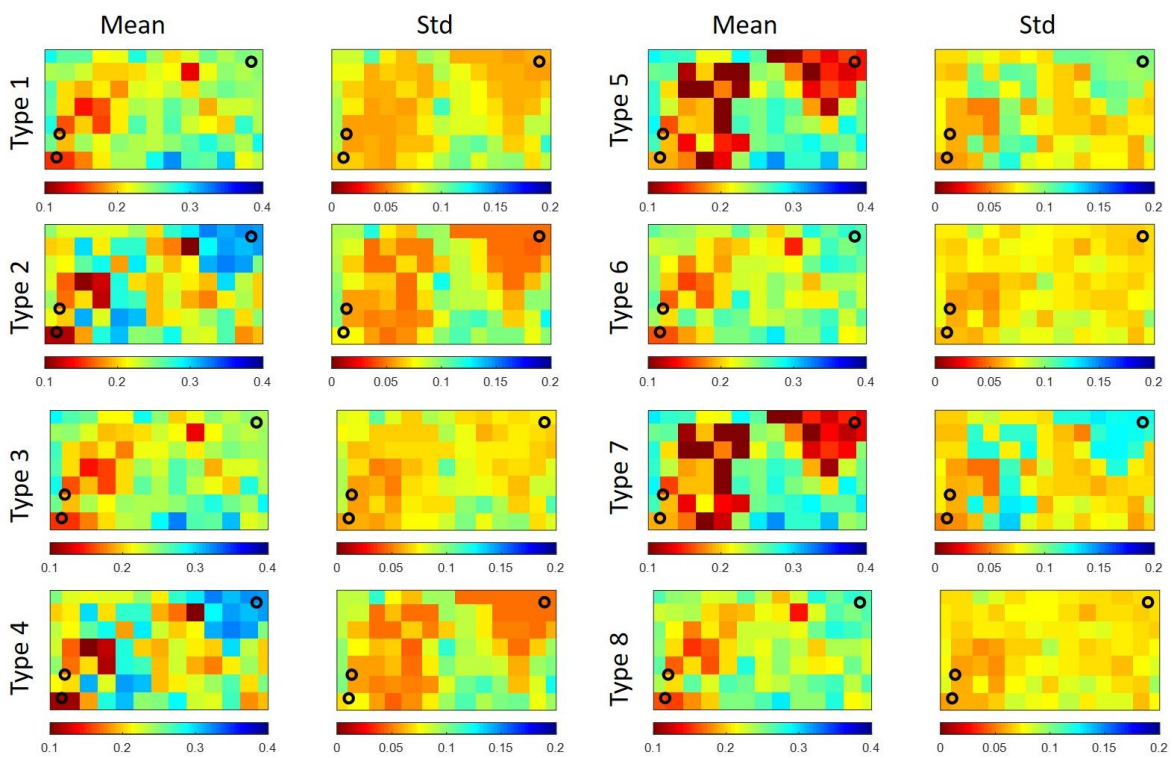

Figure S7: Downscaled soil moisture (mean and std) at a spatial resolution of 1000 m shown for all 8 types.

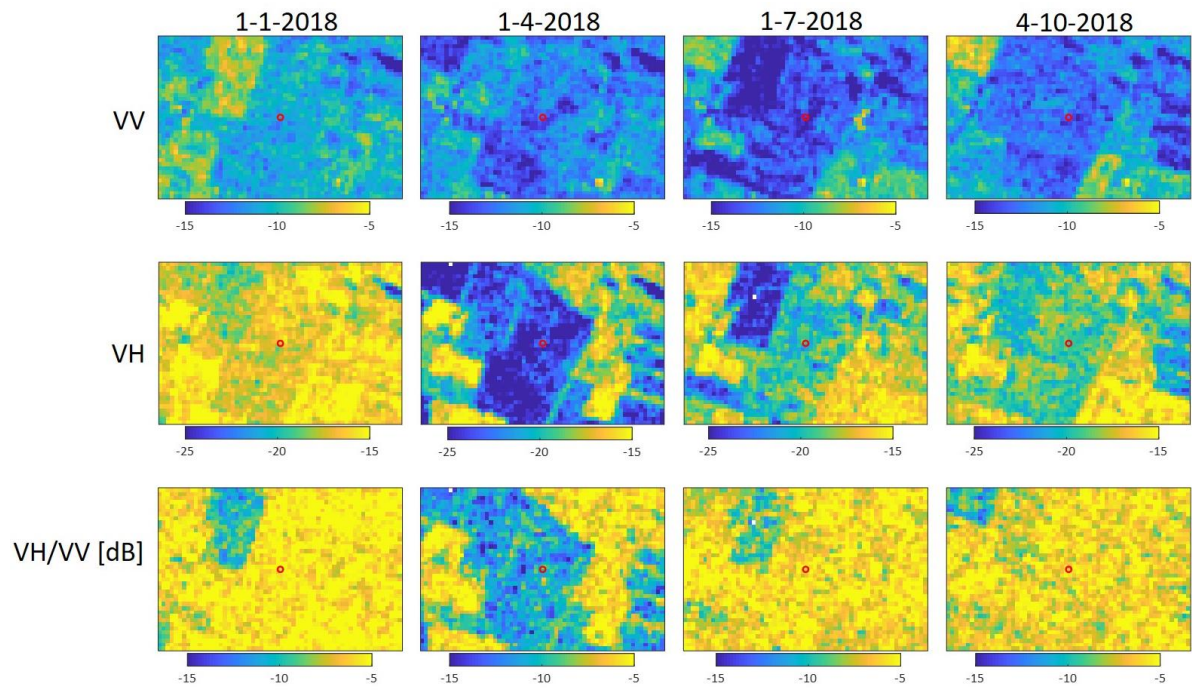

**Figure S8: Sentinel-1 backscatter in VV and VH polarization and their cross-ratio at a spatial resolution of 20 m at a zoom into the agricultural field at Voulund for four single dates representing different seasons.**
